# Supplementary material
Source: PubMed Central journal article supplement (PMC3220657)
Supplement: NIHMS329179-supplement-1.pdf [file NIHMS329179-supplement-1.pdf]

## ONLINE SUPPLEMENT

### Predictors of decline in medication adherence: Results from CoSMO

Type of manuscript: original research

Running head: Decline in adherence in older adults

**Marie Krousel-Wood MD MSPH<sup>a, b, c</sup>, Cara Joyce MS<sup>d</sup>, Elizabeth Holt PhD, MPH<sup>a</sup>, Paul Muntner PhD<sup>e</sup>, Larry S Webber PhD<sup>d</sup>, Donald E Morisky ScD, MSPH<sup>f</sup>, Edward D Frohlich MD<sup>g</sup>, Richard N Re MD<sup>g</sup>**

<sup>a</sup> Center for Health Research, Ochsner Clinic Foundation, New Orleans, LA

<sup>b</sup> Department of Epidemiology, Tulane University School of Public Health and Tropical Medicine, New Orleans, LA

<sup>c</sup> Department of Family and Community Medicine, Tulane University School of Medicine, New Orleans, LA

<sup>d</sup> Department of Biostatistics and Bioinformatics, Tulane University School of Public Health and Tropical Medicine, New Orleans, LA

<sup>e</sup> Department of Epidemiology, University of Alabama at Birmingham, Birmingham, AL

<sup>f</sup> Department of Community Health Sciences, UCLA School of Public Health, Los Angeles, CA

<sup>g</sup> Department of Cardiology-Hypertension Section, Ochsner Clinic Foundation, New Orleans, LA

### Corresponding Author:

**Marie Krousel-Wood MD, MSPH  
Ochsner Clinic Foundation  
Center for Health Research  
1514 Jefferson Highway  
New Orleans, LA 70121  
Phone: 504-842-3680  
FAX: 504-842-3648  
Email: [mawood@ochsner.org](mailto:mawood@ochsner.org)**

**Supplemental Table S1: Annual rate of decline in antihypertensive medication adherence by participant characteristics**

|                                                              | Time Periods at Risk* | Number of Events | Annual Rate of Decline | p-value |
|--------------------------------------------------------------|-----------------------|------------------|------------------------|---------|
| <i>Overall</i>                                               | 3,721                 | 159              | 4.3                    |         |
| <b><i>Socio-Demographics and Patient Characteristics</i></b> |                       |                  |                        |         |
| Age ≥ 75 years                                               | 1,912                 | 90               | 4.7                    |         |
| Age < 75 years                                               | 1,809                 | 69               | 3.8                    | 0.178   |
| Female                                                       | 2,201                 | 84               | 3.8                    |         |
| Male                                                         | 1,520                 | 75               | 4.9                    | 0.098   |
| Black race                                                   | 1,117                 | 46               | 4.1                    |         |
| White race                                                   | 2,604                 | 113              | 4.3                    | 0.760   |
| Married                                                      | 2,090                 | 79               | 3.8                    |         |
| Not married                                                  | 1,631                 | 80               | 4.9                    | 0.092   |
| High school education or greater                             | 2,969                 | 129              | 4.3                    |         |
| Less than high school education                              | 750                   | 30               | 4.0                    | 0.677   |
| Low hypertension knowledge                                   | 1,141                 | 56               | 4.9                    |         |
| Not low hypertension knowledge                               | 2,580                 | 103              | 4.0                    | 0.203   |

**Clinical / Treatment Variables**

|                                              |       |     |     |       |
|----------------------------------------------|-------|-----|-----|-------|
| Hypertension duration $\geq$ 10 years        | 2,327 | 103 | 4.4 |       |
| Hypertension duration < 10 years             | 1,383 | 56  | 4.1 | 0.583 |
| Charlson comorbidity index score $\geq$ 2†   | 1,945 | 88  | 4.5 |       |
| Charlson comorbidity index score < 2†        | 1,776 | 71  | 4.0 | 0.428 |
| Body mass index: $\geq$ 25 kg/m <sup>2</sup> | 2,777 | 117 | 4.2 |       |
| Body mass index: < 25 kg/m <sup>2</sup>      | 855   | 39  | 4.6 | 0.661 |
| 3+ classes of antihypertensive medication†   | 1,594 | 63  | 4.0 |       |
| 1 or 2 classes of medication†                | 1,973 | 90  | 4.6 | 0.372 |
| Calcium Channel Blocker Use†                 | 1,610 | 56  | 3.5 |       |
| No Calcium Channel Blocker Use†              | 1,957 | 97  | 5.0 | 0.030 |
| Beta Blocker use†                            | 1,684 | 74  | 4.4 |       |
| No Beta Blocker use†                         | 1,883 | 79  | 4.2 | 0.770 |
| Angiotension receptor blocker use†           | 837   | 37  | 4.4 |       |
| No Angiotension receptor blocker use†        | 2,730 | 116 | 4.3 | 0.830 |

|                       |       |    |     |       |
|-----------------------|-------|----|-----|-------|
| Diuretic use†         | 2,162 | 87 | 4.0 |       |
| No Diuretic use†      | 1,405 | 66 | 4.7 | 0.332 |
| Ace Inhibitor use†    | 1,823 | 81 | 4.4 |       |
| No Ace Inhibitor use† | 1,744 | 72 | 4.1 | 0.643 |

### ***Health Care System Variables***

|                                                |       |     |     |       |
|------------------------------------------------|-------|-----|-----|-------|
| Not satisfied with overall health care         | 155   | 8   | 5.2 |       |
| Satisfied with overall health care             | 3,456 | 148 | 4.3 | 0.599 |
| Not satisfied with communication               | 329   | 20  | 6.1 |       |
| Satisfied with communication                   | 3,260 | 135 | 4.1 | 0.099 |
| Not satisfied with access to health care       | 149   | 7   | 4.7 |       |
| Satisfied with access to health care           | 3,462 | 149 | 4.3 | 0.817 |
| Reduced medication due to cost                 | 103   | 6   | 5.8 |       |
| Did not reduce medication due to cost          | 3,615 | 153 | 4.2 | 0.431 |
| ≥ 6 to the primary care physician per<br>year† | 956   | 38  | 4.0 |       |
| < 6 visits to the primary care physician†      | 2,753 | 121 | 4.4 | 0.580 |

|                                                                 |       |     |     |       |
|-----------------------------------------------------------------|-------|-----|-----|-------|
| Filled antihypertensive medications in drug tier 3†             | 678   | 27  | 4.0 |       |
| Filled antihypertensive medications in drug tiers 1 and 2 only† | 2,889 | 126 | 4.4 | 0.661 |

### ***Psychosocial / Behavioral Variables***

|                                                 |       |     |     |       |
|-------------------------------------------------|-------|-----|-----|-------|
| Ever smoker                                     | 1,817 | 88  | 4.8 |       |
| Never smoker                                    | 1,797 | 68  | 3.8 | 0.117 |
| ≥ 2 alcoholic beverages / wk                    | 803   | 38  | 4.7 |       |
| < 2 alcoholic beverages / wk                    | 2,795 | 117 | 4.2 | 0.502 |
| Reduced sexual functioning                      | 2,196 | 101 | 4.6 |       |
| Normal sexual functioning                       | 1,525 | 58  | 3.8 | 0.238 |
| Depressive symptoms present                     | 477   | 33  | 6.9 |       |
| Depressive symptoms absent                      | 3,244 | 126 | 3.9 | 0.002 |
| Low health-related quality of life (mental)     | 1,128 | 56  | 5.0 |       |
| Not Low health-related quality of life (mental) | 2,576 | 103 | 4.0 | 0.182 |
| Low health-related quality of life (physical)   | 1,228 | 67  | 5.5 | 0.014 |

|                                                      |       |    |     |        |
|------------------------------------------------------|-------|----|-----|--------|
| Not Low health-related quality of life<br>(physical) | 2,476 | 92 | 3.7 |        |
| Low social support                                   | 1,306 | 68 | 5.2 |        |
| Not low social support                               | 2,415 | 91 | 3.8 | 0.038  |
| Low coping                                           | 1,765 | 73 | 4.1 |        |
| High coping                                          | 1,954 | 86 | 4.4 | 0.690  |
| High stress                                          | 1,032 | 59 | 5.7 |        |
| Low stress                                           | 2,572 | 97 | 3.8 | 0.010  |
| High Stressful Life Events score                     | 1,035 | 64 | 6.2 |        |
| Low Stressful Life Events score                      | 2,529 | 88 | 3.5 | <0.001 |

### ***Self-Management Behaviors***

|                                                  |       |     |     |       |
|--------------------------------------------------|-------|-----|-----|-------|
| Complementary and Alternative Medicine<br>Use    | 861   | 37  | 4.3 |       |
| No Complementary and Alternative<br>Medicine Use | 2,860 | 122 | 4.3 | 0.968 |
| Blood pressure checks at home                    | 1,988 | 83  | 4.2 |       |
| No blood pressure checks at home                 | 1,725 | 76  | 4.4 | 0.729 |

|                                                   |       |     |     |       |
|---------------------------------------------------|-------|-----|-----|-------|
| Trying to control or lose weight                  | 2,295 | 97  | 4.2 |       |
| Not trying to control or lose weight              | 1,426 | 62  | 4.4 | 0.859 |
| Cutting down on sodium intake                     | 2,928 | 120 | 4.1 |       |
| Not cutting down on sodium intake                 | 793   | 39  | 4.9 | 0.311 |
| Increasing number of fruits and<br>vegetables     | 2,646 | 111 | 4.2 |       |
| Not increasing number of fruits and<br>vegetables | 1,075 | 48  | 4.5 | 0.712 |

---

\* Time periods at risk were approximately one year. Participants could contribute up to 2 time periods of risk. Those who declined in adherence at the first time period were excluded from the second time period.

† In the prior year
